# Supplementary material for: Development and Implementation of a Peer Curbside Consult Service for Pediatric Hospitalists
Source: Oxford University Press journal article supplement (doi:10.1542/hpeds.2021-006348), 2022-09-13
Supplement: hpeds.2021-006348supplementarydata.pdf [file hpeds.2021-006348supplementarydata.pdf]

## Supplemental Information

**SUPPLEMENTAL TABLE 4** Illustrative Comments from Requesting Hospitalists Postconsultation Surveys

| Illustrative Comments                           |                                                                                                                                                                                     |
|-------------------------------------------------|-------------------------------------------------------------------------------------------------------------------------------------------------------------------------------------|
| Indications for Consultations                   |                                                                                                                                                                                     |
| Diagnostic uncertainty                          | It affirmed that the diagnostic path I was going on for my patient made sense given the clinical information I was able to share.                                                   |
| Management uncertainty                          | This was a very difficult, complex patient and there were no clear answers so having someone readily available to talk things through was helpful.                                  |
| Navigating patient/family psychosocial concerns | I was able to get timely advice for my patient I could immediately put into practice, main concern was the need for additional social services for the patient.                     |
| Prompting subspecialty consultation             | I was able to consult an additional service for my patient that was very useful.                                                                                                    |
| Disposition or discharge planning               | Discussed the diagnosis and management of MIS-C, specifically indications for admission vs discharge.                                                                               |
| Qualities of Consultations                      |                                                                                                                                                                                     |
| Timeliness                                      | Helped me think through my thought process. Response was quick so if I needed to change my plan, it would affect patient care.                                                      |
| Providing reassurance                           | I had already decided, but it helped me feel more comfortable with my decision.                                                                                                     |
| Prompting changes in care                       | Shortly after this consult I decided to move forward with my plan, which actually expedited the patient's care, leading to timely surgical intervention and transfer.               |
| Engaging community sites                        | As single in-house attending at community site, I can reach out to someone with similar experience and knowledge. I specifically chose the consultant with more newborn experience. |

Abbreviation: MIS-C, multisystem inflammatory syndrome in children.

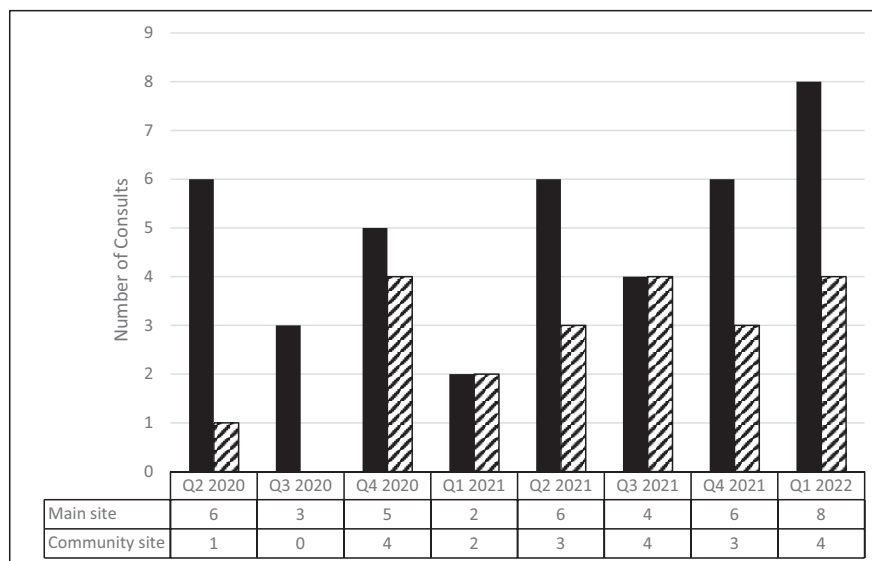

**SUPPLEMENTAL FIGURE 1** Number of consultations by clinical site over time. Q1: quarter 1, January–March; Q2: quarter 2, April–June; Q3: quarter 3, July–September; Q4: quarter 4, October–December. Main site: freestanding children's hospital. Community site: combines the 7 affiliate sites.

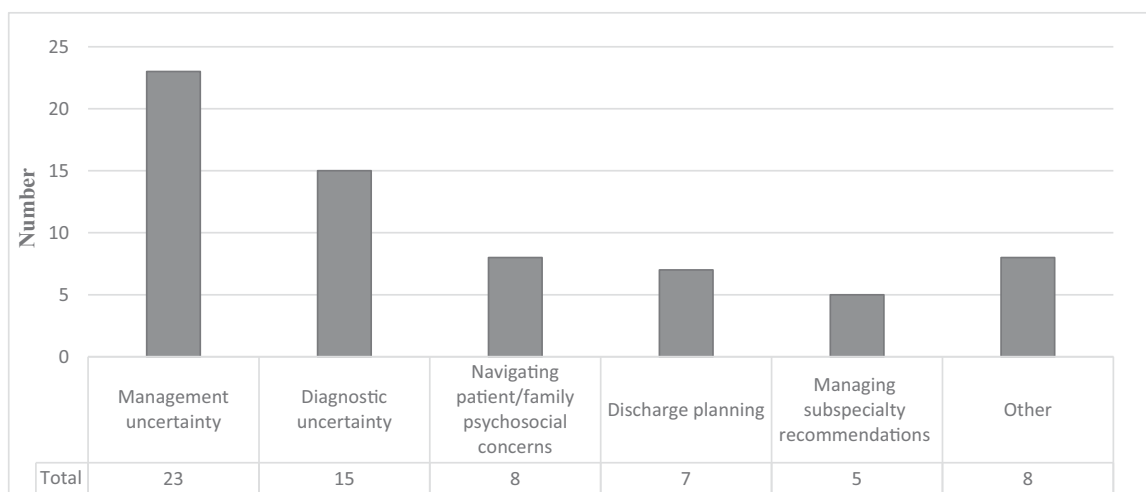

**SUPPLEMENTAL FIGURE 2** Indication for peer consultation as reported by requesting hospitalists.\* \*Requesting hospitalists can choose more than one indication for consultation.

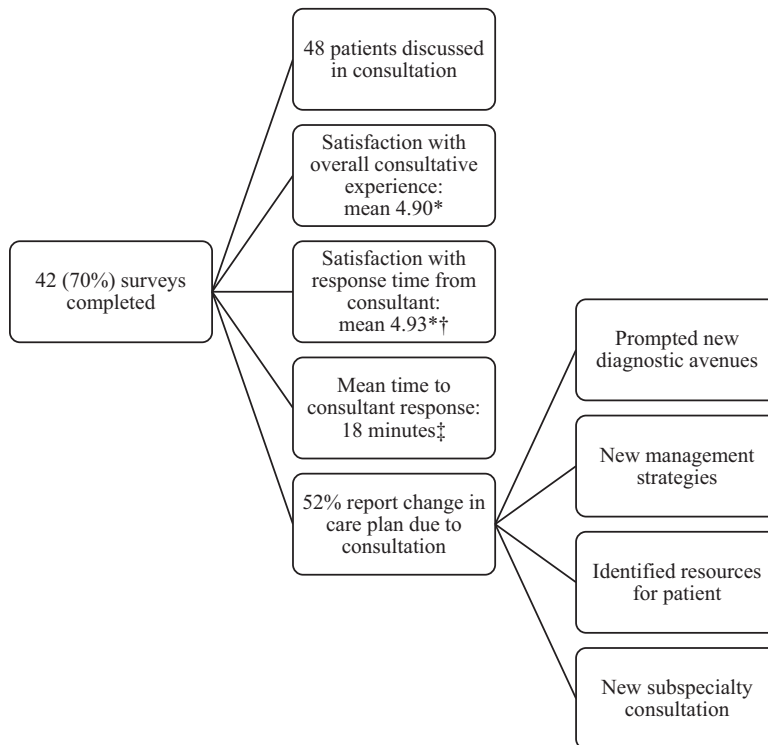

**SUPPLEMENTAL FIGURE 3** Preliminary data from requesting hospitalists postconsultation surveys.

\*Likert scoring anchored by 1, very dissatisfied, and 5, very satisfied (min 1.00, max 5.00). † $n = 41$  responses. ‡ $n = 25$  responses, min 0 minutes, max 120 minutes, median 5 minutes, 95% confidence interval, 0-60.
